# Supplementary material for: A Symmetrically π‐Expanded Carbazole Incorporating Fluoranthene Moieties
Source: PubMed Central journal article supplement — Chemistry. 2022 Oct 5;28(67):e202201424. doi: 10.1002/chem.202201424 (PMC10091706; doi:10.1002/chem.202201424), 2022-10-05
Supplement: CHEM-28-0-s001.pdf [file CHEM-28-0-s001.pdf]

# Chemistry–A European Journal

Supporting Information

## **A Symmetrically $\pi$ -Expanded Carbazole Incorporating Fluoranthene Moieties**

Alexander Vogel, Till Schreyer, John Bergner, Frank Rominger, Thomas Oeser, and  
Milan Kivala\*

## Table of Contents

|   |                                                                   |     |
|---|-------------------------------------------------------------------|-----|
| 1 | General Methods and Instrumentation.....                          | S2  |
| 2 | Synthetic Protocols.....                                          | S3  |
| 3 | Nuclear Magnetic Resonance Spectra.....                           | S6  |
| 4 | Crystallographic Data Collection and Structure Determination..... | S16 |
| 5 | UV/Vis Spectroscopy.....                                          | S20 |
| 6 | Cyclic Voltammetry.....                                           | S22 |
| 7 | Theoretical Calculations.....                                     | S23 |
| 8 | References.....                                                   | S25 |

# 1 General Methods and Instrumentation

Cyclic voltammetry was performed on a computer-controlled BASi Cell Stand instrument under nitrogen atmosphere using a standard three-electrode assembly connected to a potentiostat and at a scan rate of 100 mVs<sup>-1</sup>. The working electrode was a glassy carbon disk electrode (3.0 mm diameter), a platinum wire was used as auxiliary electrode and the quasi-reference electrode was an Ag/AgCl (3 M NaCl) electrode. The samples were measured in 0.1M electrolyte solutions of *n*-Bu<sub>4</sub>NPF<sub>6</sub> (used without further purification) in anhydrous CH<sub>2</sub>Cl<sub>2</sub> and were purged with nitrogen for 20 min prior to analysis. Each measurement was calibrated with an internal standard (ferrocene/ferrocenium (Fc/Fc<sup>+</sup>)).

X-ray crystallographic data were measured on a Stoe Stadivari diffractometer or Bruker APEX II Quazar diffractometer. The structures were solved and refined with SHELXT-2014<sup>[1]</sup> and refined against F<sub>2</sub> with a full-matrix least-squares algorithm using the SHELXL-2018/3<sup>[2]</sup> software. After full-matrix least-square refinement of the non-hydrogen atoms with anisotropic thermal parameters, the hydrogen atoms were placed in calculated positions using a riding model.

Theoretical calculations were performed using the Gaussian 16 software package.<sup>[3]</sup> The geometries of the molecules were optimized using the B3LYP<sup>[4]</sup> functional and 6-31G(d)<sup>[5]</sup> as the basis set. Nucleus independent chemical shifts (NICS)<sup>[6]</sup> values were calculated using the gauge-independent atomic orbital (GIAO)<sup>[7]</sup> method at the B3LYP/6-31G(d) level of theory. Highest occupied molecular orbitals (HOMOs) lowest unoccupied molecular orbitals (LUMOs) were visualized using the Avogadro<sup>[8]</sup> software package.

## 2 Synthetic Protocols

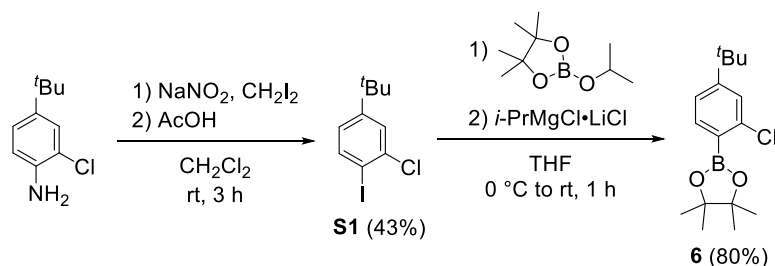

**Scheme S1.** Synthesis of boronic acid ester **6** from 4-(*tert*-butyl)-2-chloroaniline.

Compound **S1** was prepared according to a procedure described by *Stack* and coworkers for similar compounds.<sup>[9]</sup> The procedure for the synthesis of **6** was adapted from a general procedure for the synthesis of arylboronic esters disclosed by *Chavant* and coworkers.<sup>[10]</sup>

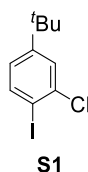

### 4-*tert*-Butyl-2-chloro-1-iodobenzene (**S1**).

To a solution of 4-(*tert*-butyl)-2-chloroaniline (1.00 g, 5.44 mmol) in CH<sub>2</sub>Cl<sub>2</sub> (90 mL) NaNO<sub>2</sub> (1.88 g, 27.2 mmol) and CH<sub>2</sub>I<sub>2</sub> (0.88 mL, 2.92 g, 10.9 mmol) were added. After stirring for 20 min, acetic acid (6.54 g, 6.23 mL, 109 mmol) was added dropwise and the reaction mixture was stirred for 3 h at room temperature. The reaction mixture was treated with 10 wt.% aq. Na<sub>2</sub>S<sub>2</sub>O<sub>4</sub> (50 mL) and extracted with CH<sub>2</sub>Cl<sub>2</sub> (100 mL). The combined organic layers were washed with saturated aq. NaCl (50 mL) and dried (Na<sub>2</sub>SO<sub>4</sub>). The solvent was removed under reduced pressure and the resulting red oil was purified by column chromatography (SiO<sub>2</sub>, petroleum ether/EtOAc 50:1). Residual CH<sub>2</sub>I<sub>2</sub> was removed under reduced pressure. Compound **S1** was obtained as a colorless oil (685 mg, 2.33 mmol, 43%).

*R*<sub>f</sub> = 0.90 (SiO<sub>2</sub>, petroleum ether/EtOAc 50:1).

<sup>1</sup>H NMR (301 MHz, CDCl<sub>3</sub>) δ 7.74 (d, *J* = 8.4, 1H), 7.46 (d, *J* = 2.3, 1H), 6.98 (dd, *J* = 8.4, 2.3, 1H), 1.29 (s, 9H) ppm.

<sup>13</sup>C NMR (75 MHz, CDCl<sub>3</sub>) δ 153.4, 139.6, 138.1, 126.7, 125.4, 93.9, 34.7, 30.9 ppm.

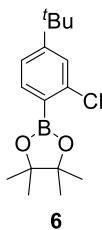

**2-(4-*tert*-Butyl-2-chlorophenyl)-4,4,5,5-tetramethyl-1,3,2-dioxaborolane (6).**

Under N<sub>2</sub> atmosphere **S1** (1.98 g, 6.71 mmol) and 2-isopropoxy-4,4,5,5-tetramethyl-1,3,2-dioxaborolane (1.75 g, 9.39 mmol) were dissolved in dry THF (20 mL). The reaction mixture was cooled to 0 °C and *i*-PrMgCl•LiCl (1.3M in THF, 6.19 mL, 1.17 g, 8.05 mmol) was added dropwise over the course of 5 min. The reaction mixture was stirred for 1 h at room temperature. Saturated aq. NH<sub>4</sub>Cl was added to the reaction mixture, which was then extracted with EtOAc (3 × 25 mL). The combined organic layers were washed with saturated aq. NaCl (40 mL) and dried (Na<sub>2</sub>SO<sub>4</sub>). The solvent was removed under reduced pressure and the residue was purified by sublimation (5 × 10<sup>-2</sup> mbar, 100 °C). Compound **6** (1.59 g, 5.40 mmol, 80%) was obtained as a colorless solid.

Mp 92–96 °C.

<sup>1</sup>H NMR (400 MHz, (CD<sub>3</sub>)<sub>2</sub>CO) δ 7.64 (d, *J* = 7.8, 1H), 7.40 (d, *J* = 1.7, 1H), 7.36 (dd, *J* = 7.9, 1.8, 1H), 1.35 (s, 12H), 1.32 (s, 9H) ppm.

<sup>13</sup>C NMR (101 MHz, (CD<sub>3</sub>)<sub>2</sub>CO) δ 156.8, 140.2, 137.5, 127.2, 124.0, 84.7, 35.5, 31.2, 25.1 ppm. (One signal coincident or not observed).

<sup>11</sup>B NMR (128 MHz, (CD<sub>3</sub>)<sub>2</sub>CO) δ 30.60 ppm.

IR (ATR):  $\tilde{\nu}$  2964 (s), 2926 (m), 2867 (m), 1603 (s), 1535 (m), 1319 (s), 1264 (m), 834 (m) cm<sup>-1</sup>.

EI HRMS: calc. for C<sub>16</sub>H<sub>24</sub>BClO<sub>2</sub>: 294.1552 [M<sup>+</sup>], found 294.1563.

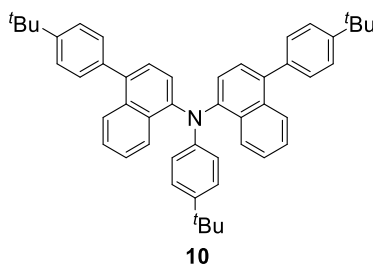

***N*,4-Bis(4-*tert*-butylphenyl)-*N*-[4-(4-*tert*-butylphenyl)naphthalen-1-yl]naphthalen-1-amine (10).**

In a microwave reaction vessel, a solution of compound **5** (50.0 mg, 89.4 μmol), [Pd(PPh<sub>3</sub>)<sub>4</sub>] (2.1 mg, 1.8 μmol), and 2-(4-*tert*-butylphenyl)-4,4,5,5-tetramethyl-1,3,2-dioxaborolane (69.8 mg, 268 μmol) in ethanol/toluene (1:2, vol./vol., 18 mL) was deoxygenated for 10 min under N<sub>2</sub> atmosphere. A deoxygenated solution of aq. K<sub>2</sub>CO<sub>3</sub> (2 M, 1.12 mL, 309 mg, 2.23 mmol) was added, the reaction vessel was sealed and heated to 100 °C for 1 h. After the reaction mixture was allowed to cool to rt, H<sub>2</sub>O (10 mL) was added. The organic phase was separated and the aq. phase was extracted with CH<sub>2</sub>Cl<sub>2</sub> (3 × 20 mL). The combined organic layers were washed with saturated aq. NaCl and dried (Na<sub>2</sub>SO<sub>4</sub>). The solvent was removed and the residue was purified by column chromatography (SiO<sub>2</sub>, petroleum ether/CH<sub>2</sub>Cl<sub>2</sub> 5:1) followed by recrystallization from petroleum ether to obtain **10** (24.3 mg, 36.5 μmol, 41%) as a colorless solid.

$R_f = 0.45$  (SiO<sub>2</sub>, petroleum ether/CH<sub>2</sub>Cl<sub>2</sub> 5:1).

Mp 200 °C.

<sup>1</sup>H NMR (500 MHz, CD<sub>2</sub>Cl<sub>2</sub>)  $\delta$  8.26–8.23 (m, 2H), 8.02–7.97 (m, 2H), 7.56–7.51 (m, 4H), 7.47–7.44 (m, 4H), 7.42 (ddd,  $J = 8.4, 6.8, 1.4$  Hz, 2H), 7.36 (ddd,  $J = 8.2, 6.8, 1.3$  Hz, 2H), 7.32 (d,  $J = 7.6$  Hz, 2H), 7.28 (d,  $J = 7.6$  Hz, 2H), 7.22–7.17 (m, 2H), 6.79–6.74 (m, 2H), 1.42 (s, 18H), 1.29 (s, 9H) ppm.

<sup>13</sup>C NMR (126 MHz, CD<sub>2</sub>Cl<sub>2</sub>)  $\delta$  150.6, 148.6, 145.0, 144.2, 138.0, 138.0, 133.7, 130.8, 130.2, 127.5, 127.2, 126.4, 126.3, 126.2, 125.6, 125.0, 124.7, 120.9, 34.9, 34.4, 31.6, 31.6 ppm.

IR (ATR):  $\tilde{\nu}$  3072 (w), 3033 (w), 2958 (m), 2866 (w), 1610 (w), 1577 (m), 1509 (s), 1426 (w), 1386 (s), 1262 (s), 826 (s), 763 (s) cm<sup>-1</sup>.

UV/Vis (CH<sub>2</sub>Cl<sub>2</sub>, rt):  $\lambda_{\max}$  in nm ( $\epsilon$  in L mol<sup>-1</sup> cm<sup>-1</sup>) 274 (27200), 300 (16400), 361 (18200) nm.

MALDI HRMS (DCTB): calc. for C<sub>50</sub>H<sub>51</sub>N:  $m/z$  665.4016 [M<sup>+</sup>], found 665.4019.

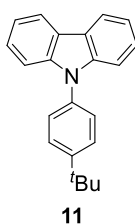

### 9-(4-*tert*-Butylphenyl)-9*H*-carbazole (**11**).<sup>[11]</sup>

In a sealed microwave reaction vessel, a mixture of 9*H*-carbazole (200 mg, 1.20 mmol), 1-*tert*-butyl-4-iodobenzene (600  $\mu$ L, 882 mg, 3.39 mmol), activated copper (228 mg, 3.59 mmol), and K<sub>2</sub>CO<sub>3</sub> (331 mg, 2.39 mmol) was heated to 200 °C for 20 h under nitrogen atmosphere. Afterwards, the reaction mixture was subjected to column chromatography (SiO<sub>2</sub>, petroleum ether/CH<sub>2</sub>Cl<sub>2</sub> 10:1) to afford **11** (310 mg, 1.04 mmol, 87%) as a colorless solid.

$R_f = 0.78$  (SiO<sub>2</sub>, petroleum ether/CH<sub>2</sub>Cl<sub>2</sub> 5:1).

Mp 191 °C (lit. 191–192 °C).<sup>[11a]</sup>

<sup>1</sup>H NMR (301 MHz, CDCl<sub>3</sub>)  $\delta$  8.16 (dt,  $J = 7.7, 1.1$  Hz, 2H), 7.64–7.59 (m, 2H), 7.52–7.47 (m, 2H), 7.47–7.37 (m, 4H), 7.32–7.26 (m, 2H), 1.44 (s, 9H) ppm.

<sup>13</sup>C NMR (101 MHz, CDCl<sub>3</sub>)  $\delta$  150.6, 141.2, 135.1, 126.9, 126.8, 126.0, 123.4, 120.4, 119.9, 110.0, 34.9, 31.6 ppm.

IR (ATR):  $\tilde{\nu}$  3045 (w), 2960 (m), 1626 (w), 1592 (m), 1519 (s), 1451 (s), 1232 (s), 830 (m), 748 (s), 723 (s) cm<sup>-1</sup>.

UV/Vis (CH<sub>2</sub>Cl<sub>2</sub>, rt):  $\lambda_{\max}$  in nm ( $\epsilon$  in L mol<sup>-1</sup> cm<sup>-1</sup>) 242 (48200), 263 (21000), 286 (16900), 294 (19200), 318 (2990), 329 (4310), 342 (4680) nm.

EI HRMS: calc. for C<sub>22</sub>H<sub>21</sub>N: 299.1669 [M<sup>+</sup>], found 299.1685.

Spectral data consistent with those reported in literature.<sup>[11b]</sup>

### 3 Nuclear Magnetic Resonance Spectra

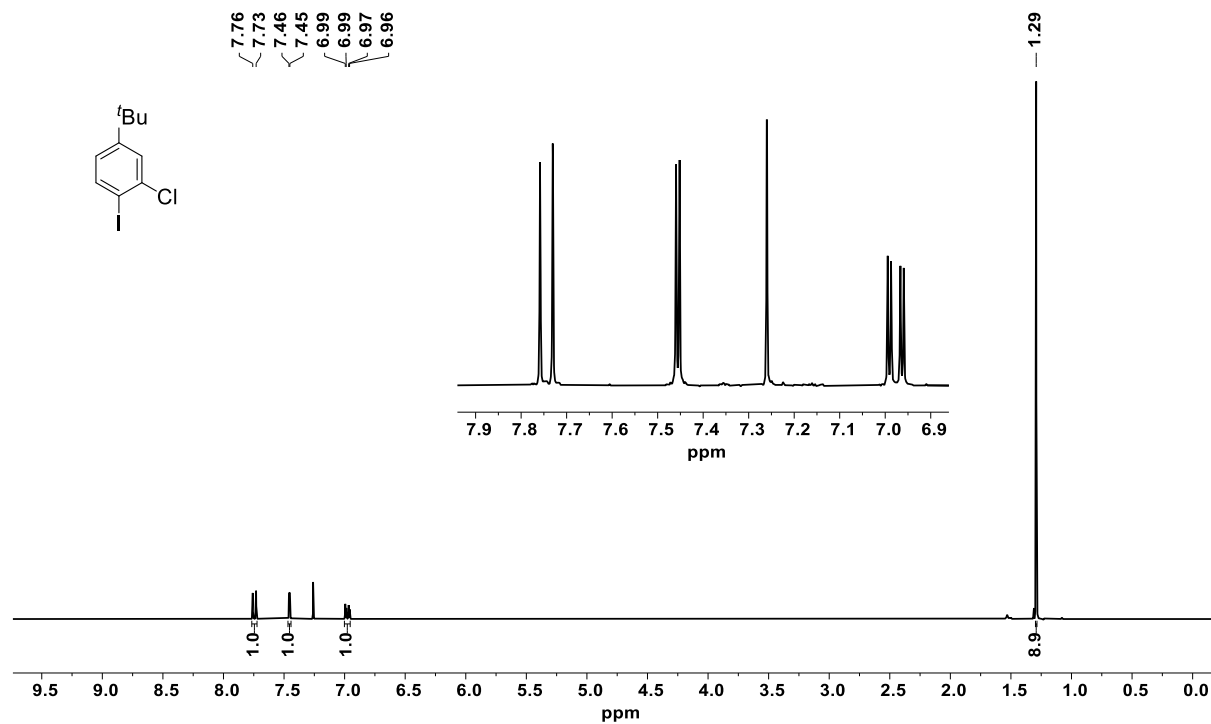

Figure S1 <sup>1</sup>H NMR spectrum of S1 (301 MHz, CDCl<sub>3</sub>, rt).

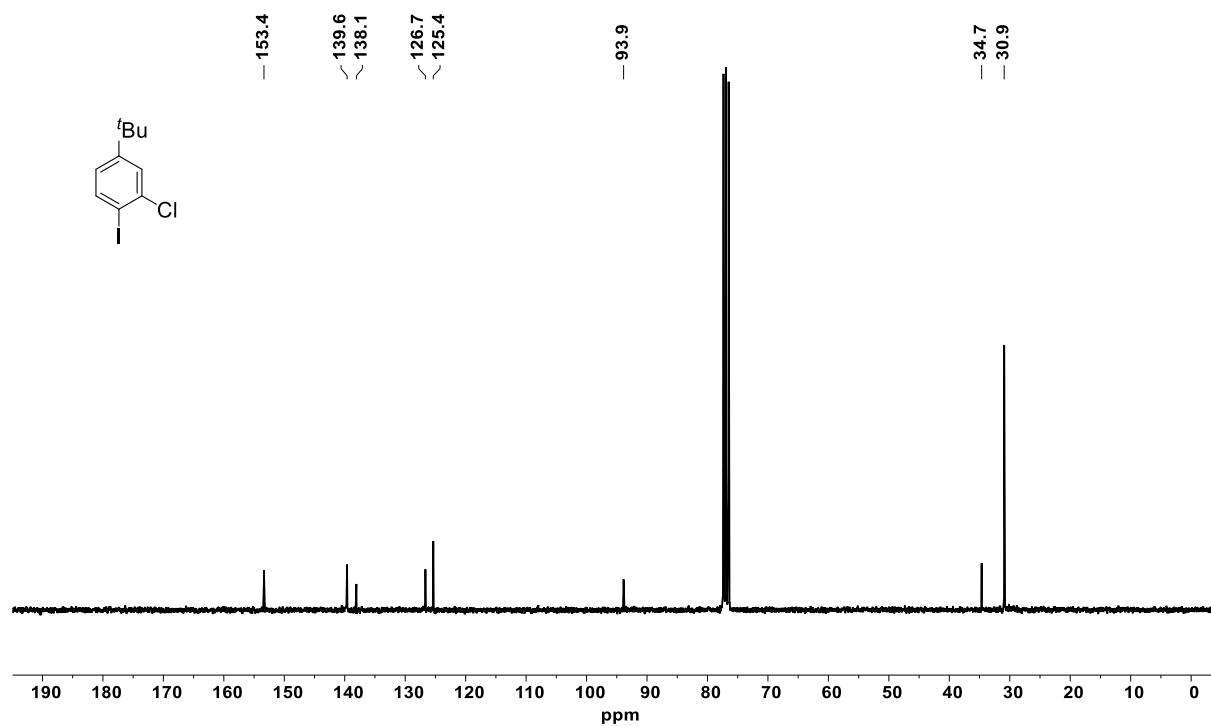

Figure S2. <sup>13</sup>C NMR spectrum of S1 (75 MHz, CDCl<sub>3</sub>, rt).

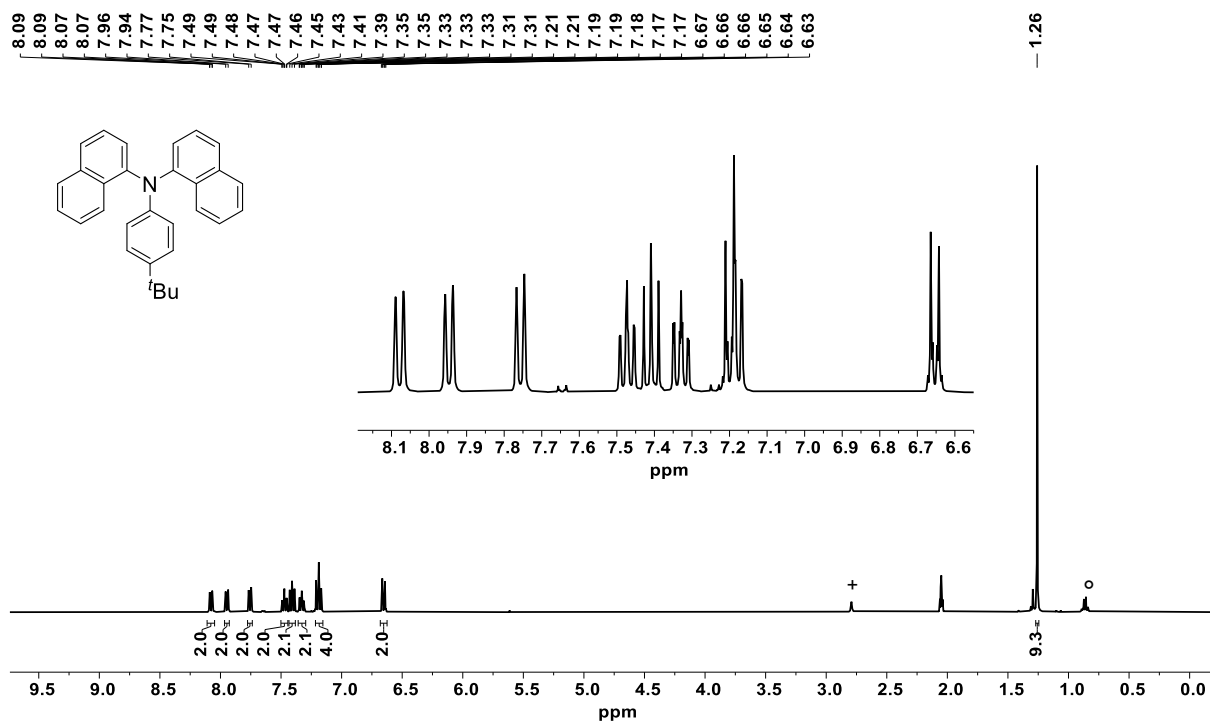

**Figure S3** <sup>1</sup>H NMR spectrum of **4** (400 MHz, (CD<sub>3</sub>)<sub>2</sub>CO, rt); ° petroleum ether, + water.

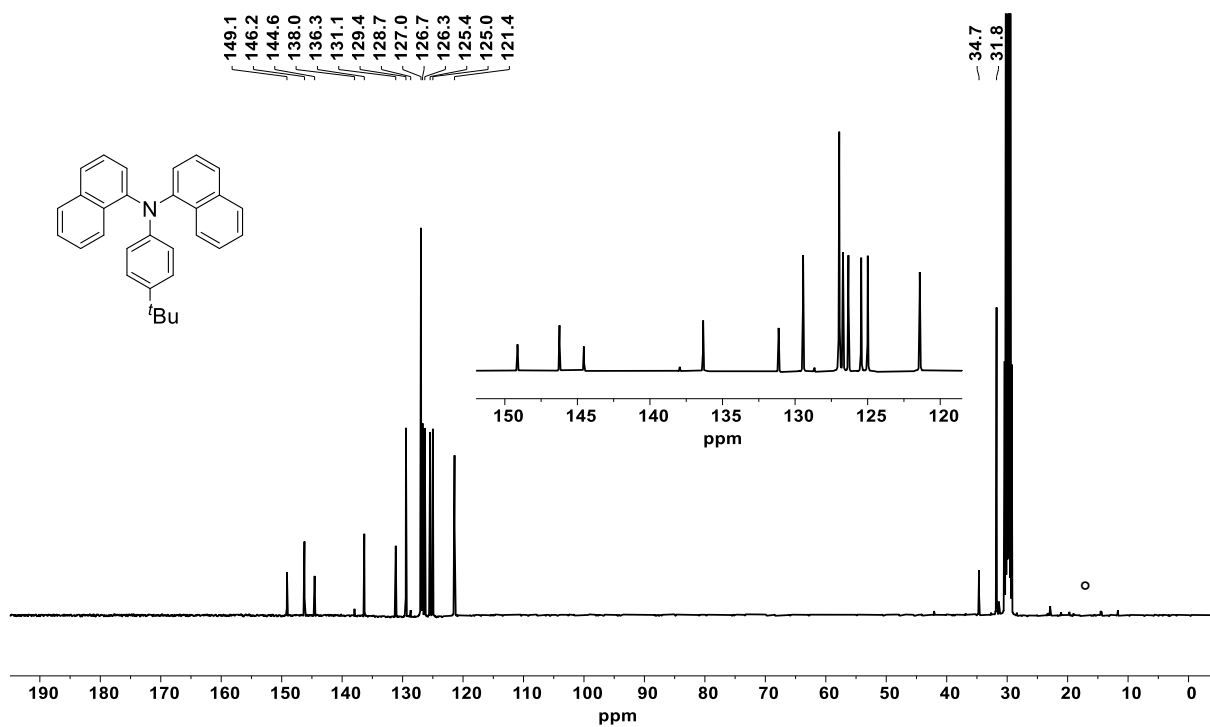

**Figure S4** <sup>13</sup>C NMR spectrum of **4** (101 MHz, (CD<sub>3</sub>)<sub>2</sub>CO, rt); ° petroleum ether.



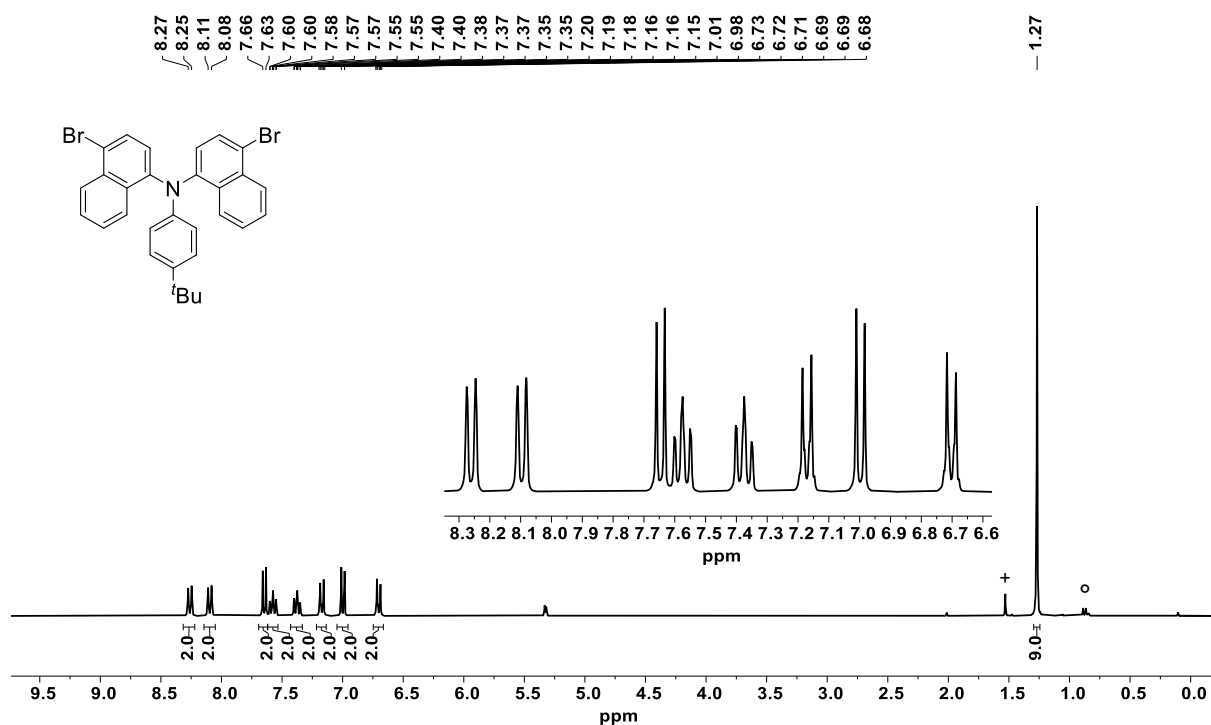

**Figure S5** <sup>1</sup>H NMR spectrum of **5** (300 MHz, CD<sub>2</sub>Cl<sub>2</sub>, rt); ° petroleum ether, + H<sub>2</sub>O.

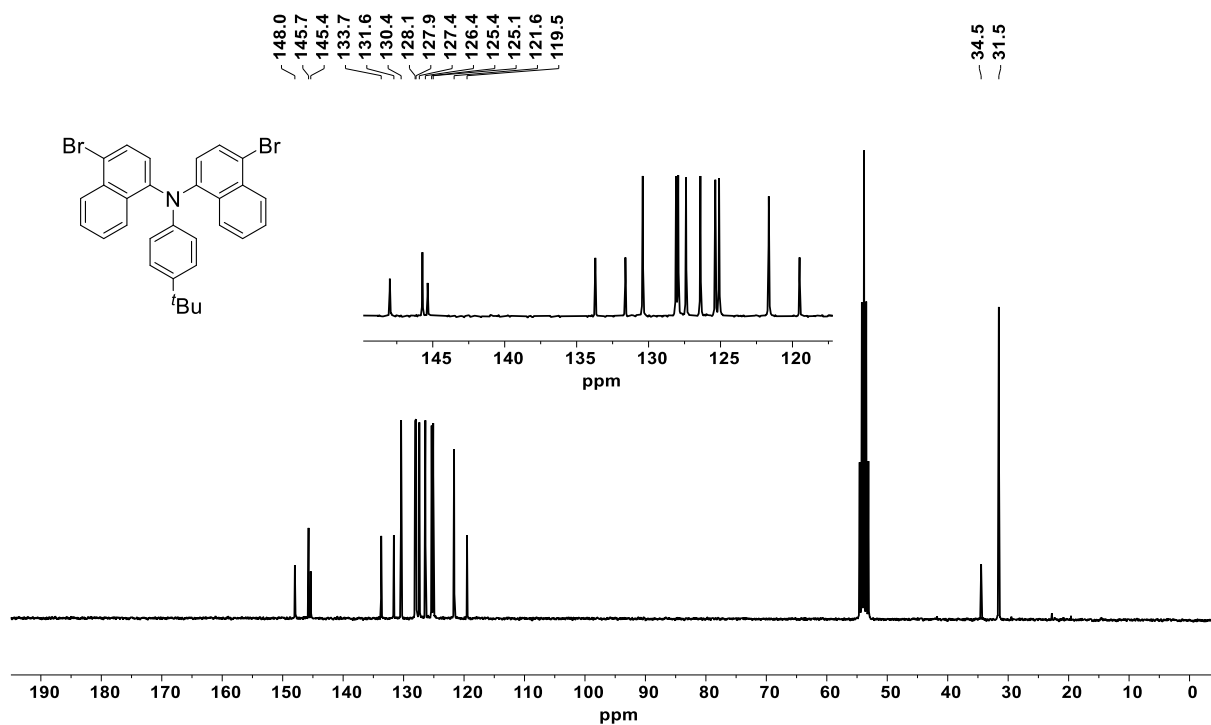

**Figure S6** <sup>13</sup>C NMR spectrum of **5** (75 MHz, CD<sub>2</sub>Cl<sub>2</sub>, rt).

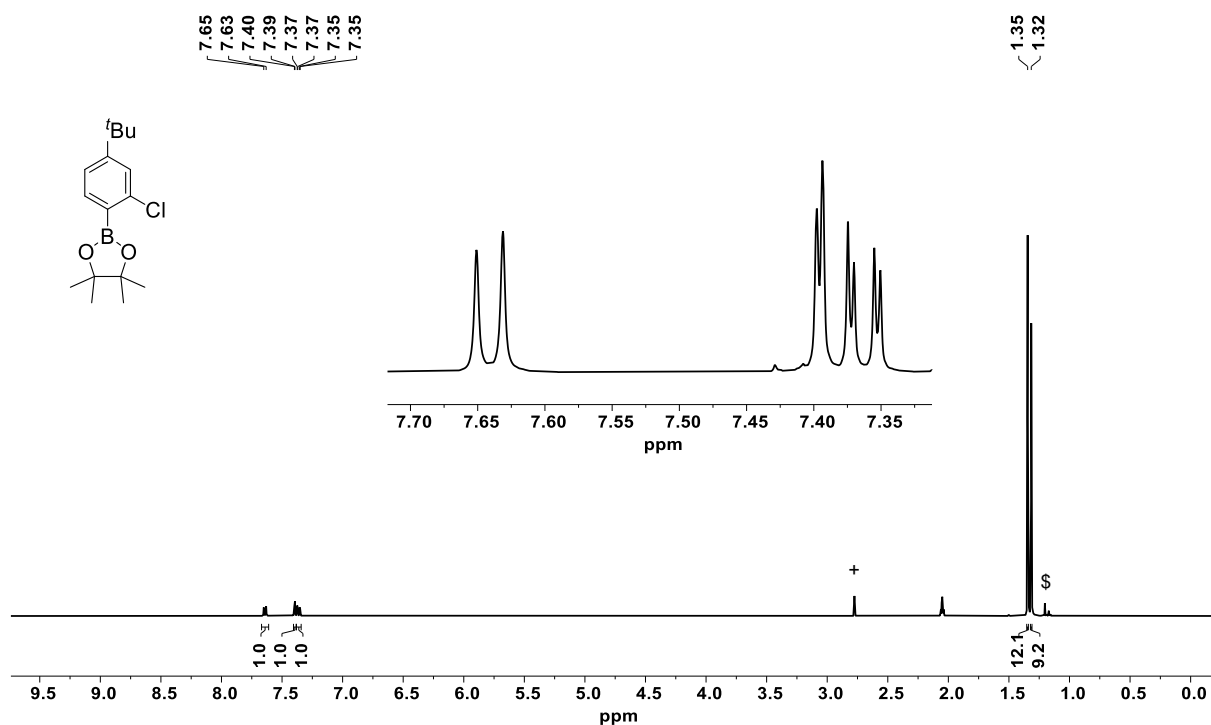

**Figure S7** <sup>1</sup>H NMR spectrum of **6** (400 MHz, (CD<sub>3</sub>)<sub>2</sub>CO, rt); § unknown impurity, + H<sub>2</sub>O.

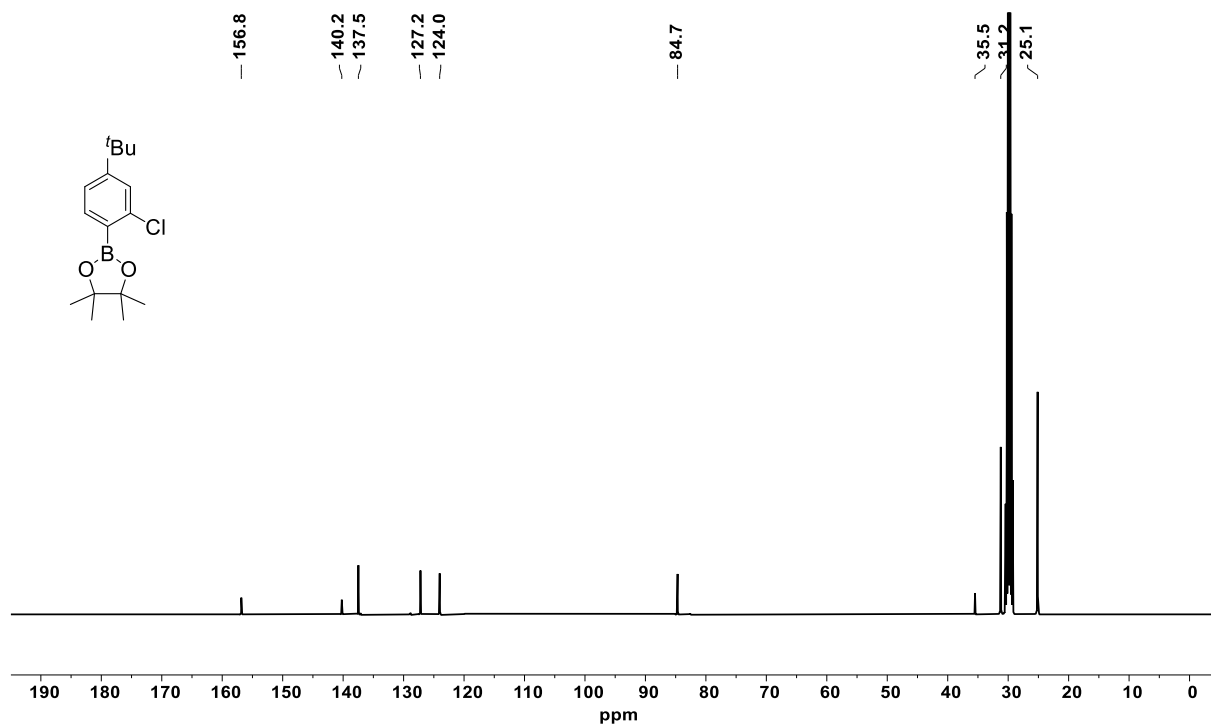

**Figure S8** <sup>13</sup>C NMR spectrum of **6** (101 MHz, (CD<sub>3</sub>)<sub>2</sub>CO, rt).

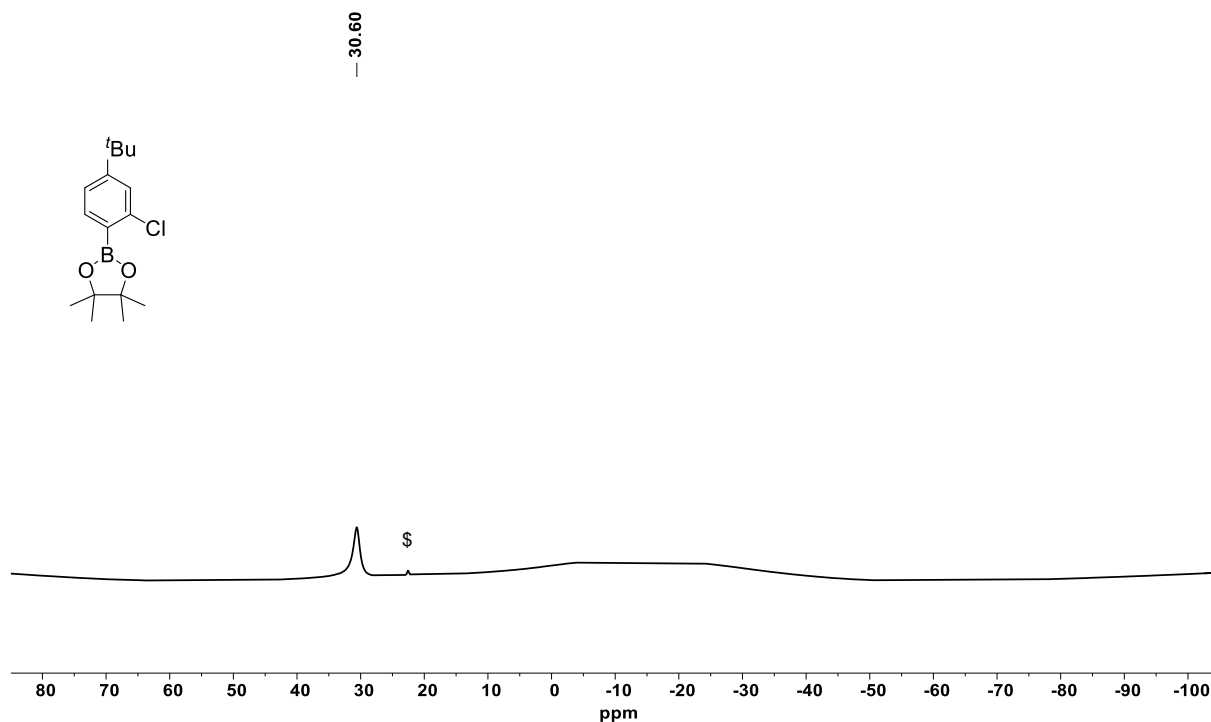

**Figure S9**  $^{11}\text{B}$  NMR spectrum of **6** (128 MHz,  $(\text{CD}_3)_2\text{CO}$ , rt); § unknown impurity.

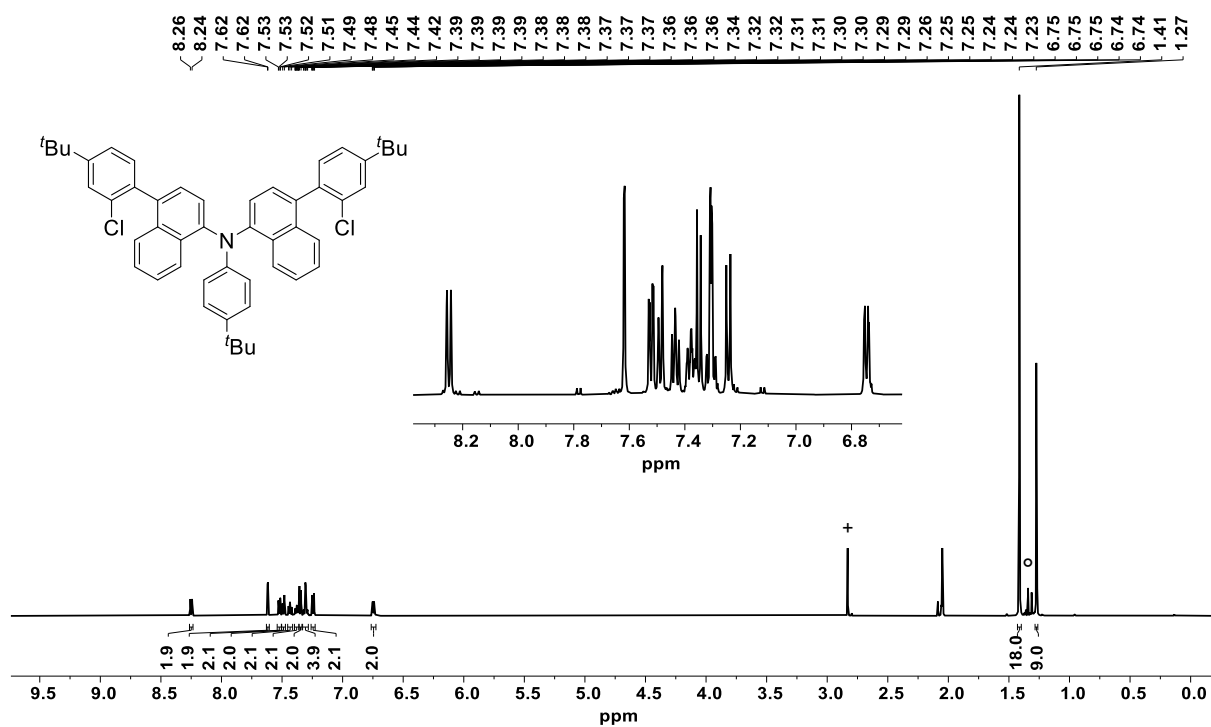

**Figure S10**  $^1\text{H}$  NMR spectrum of **7** (600 MHz,  $(\text{CD}_3)_2\text{CO}$ , rt); ° petroleum ether, + water.

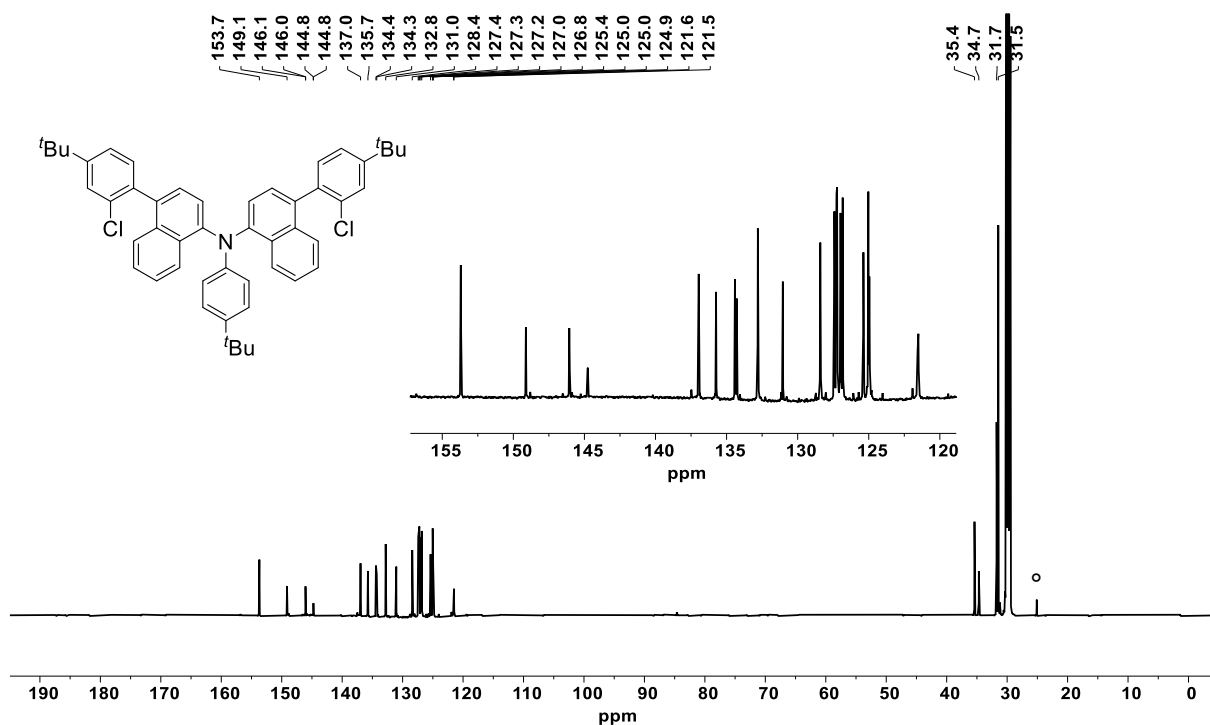

**Figure S11** <sup>13</sup>C NMR spectrum of **7** (151 MHz, (CD<sub>3</sub>)<sub>2</sub>CO, rt); ° petroleum ether.

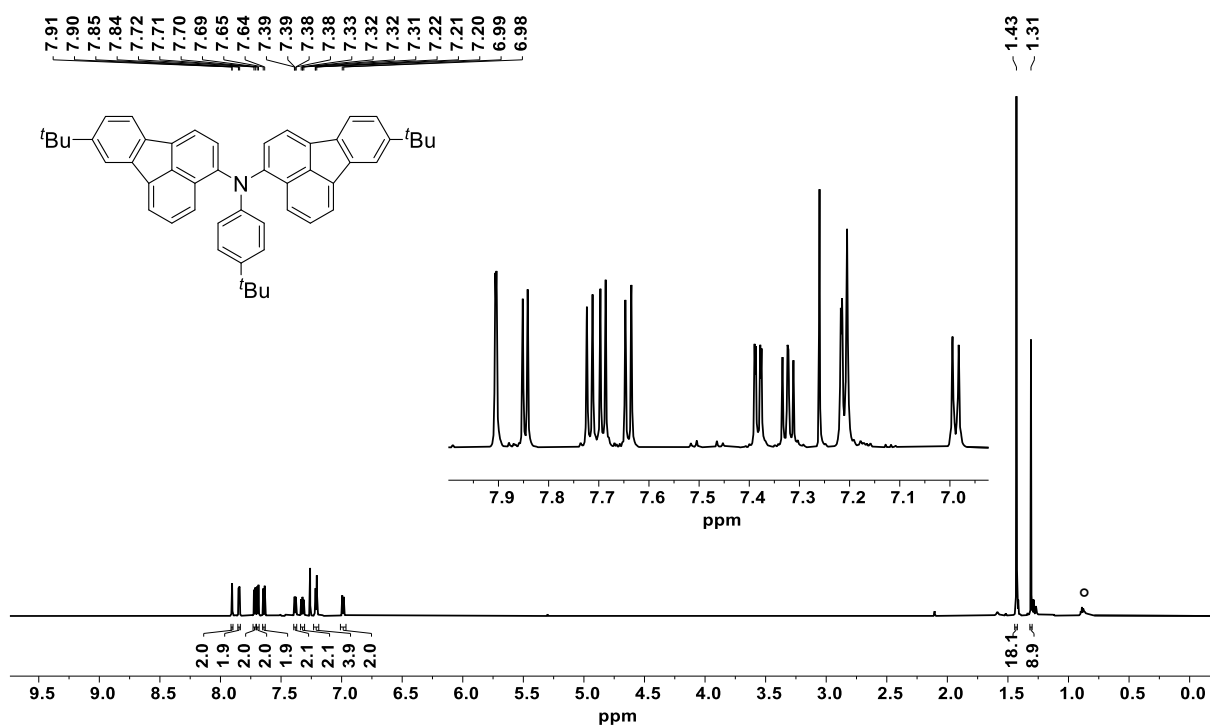

**Figure S12** <sup>1</sup>H NMR spectrum of **8** (700 MHz, CDCl<sub>3</sub>, rt); ° petroleum ether.

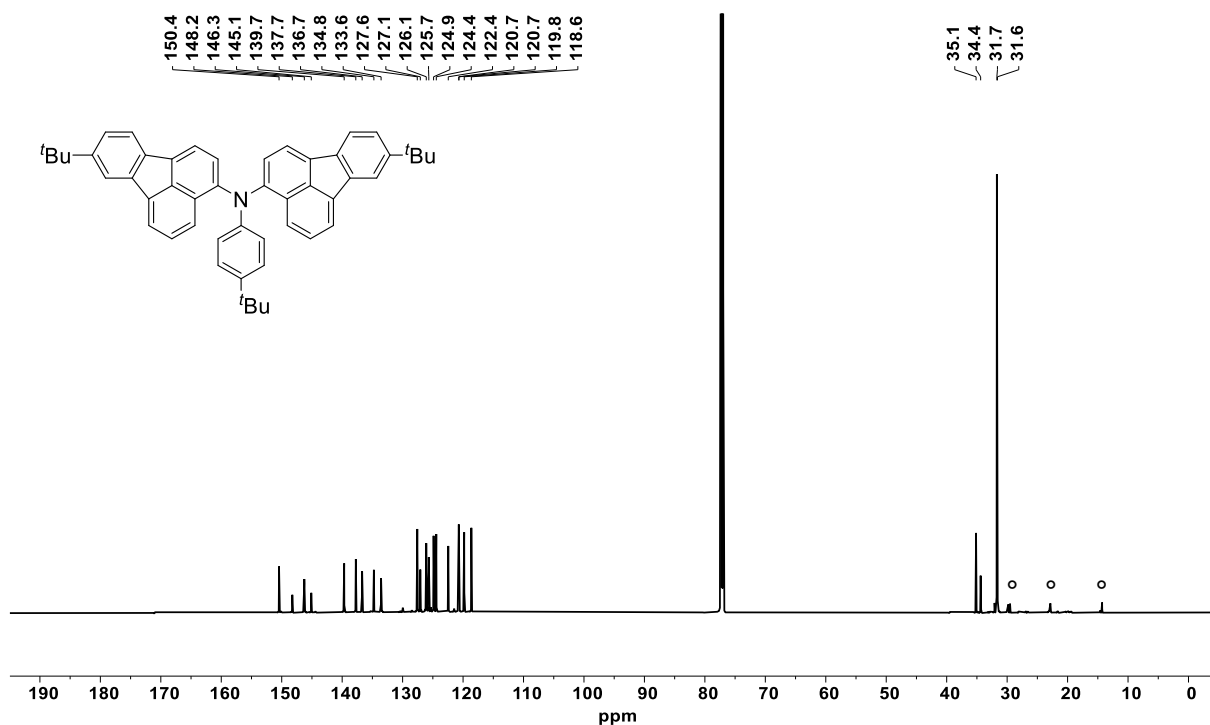

**Figure S13** <sup>13</sup>C NMR spectrum of **8** (176 MHz, CDCl<sub>3</sub>, rt); ° petroleum ether.

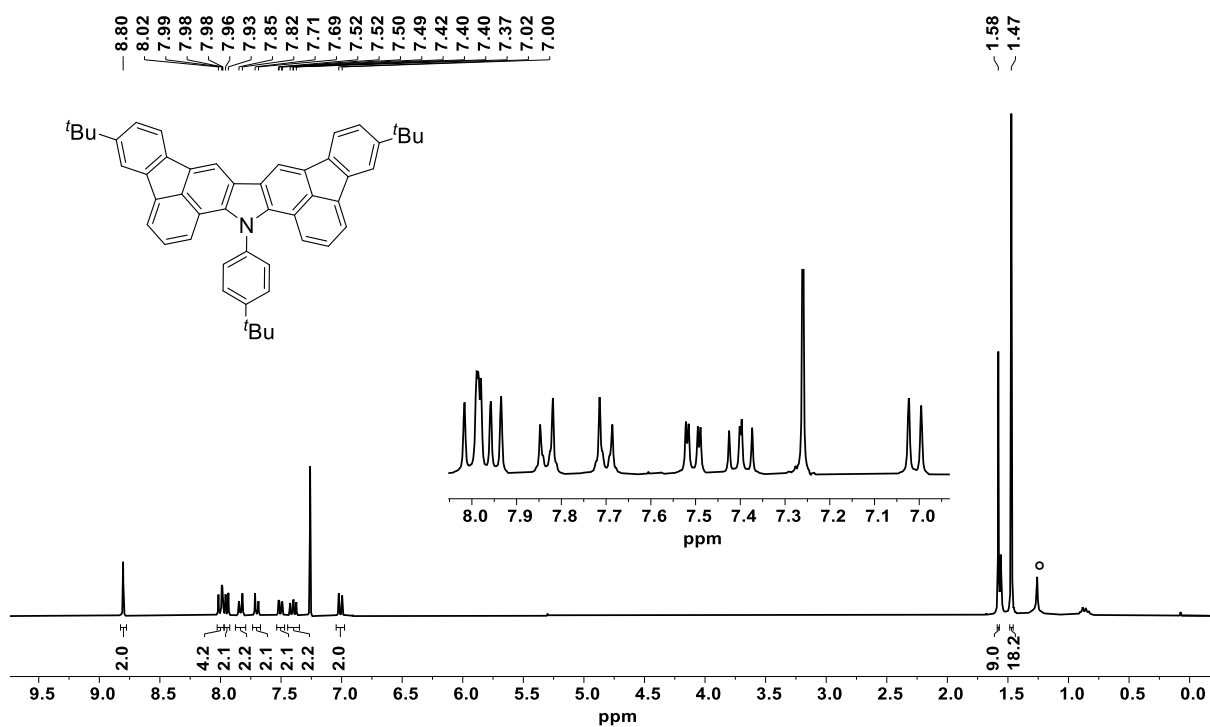

**Figure S14** <sup>1</sup>H NMR spectrum of **9** (301 MHz, CDCl<sub>3</sub>, rt); ° petroleum ether.

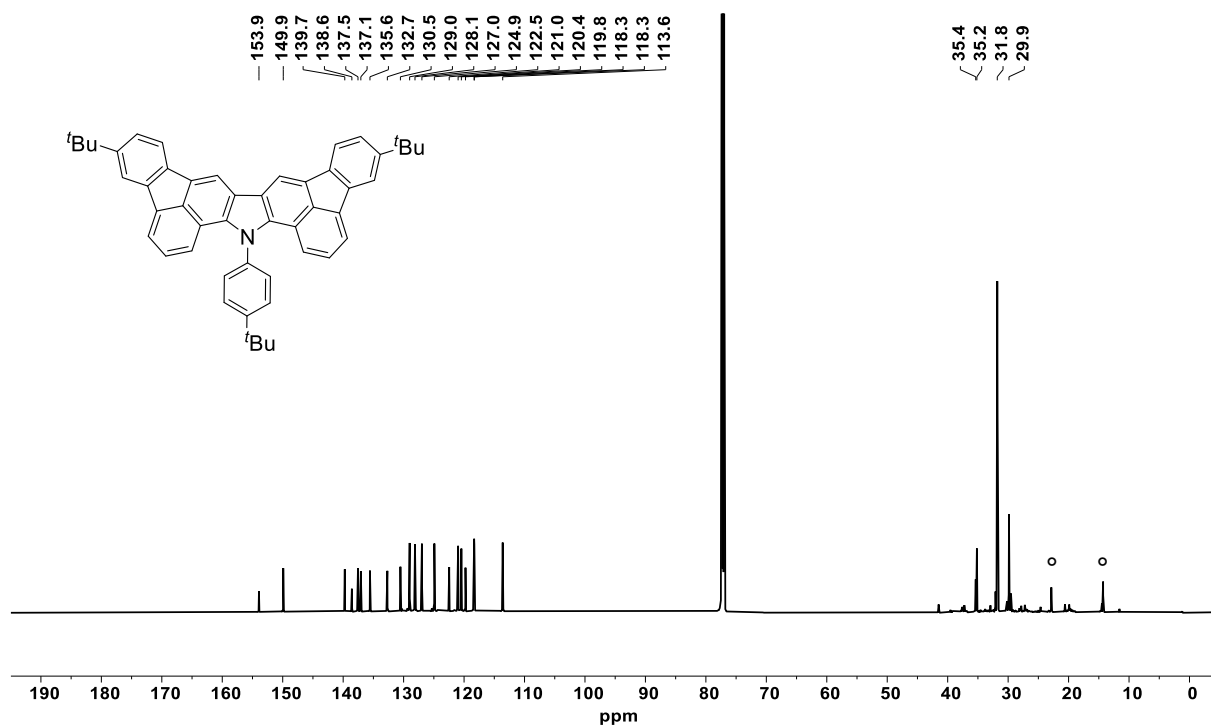

**Figure S15**  $^{13}\text{C}$  NMR spectrum of **9** (176 MHz,  $\text{CDCl}_3$ , rt), ° petroleum ether.

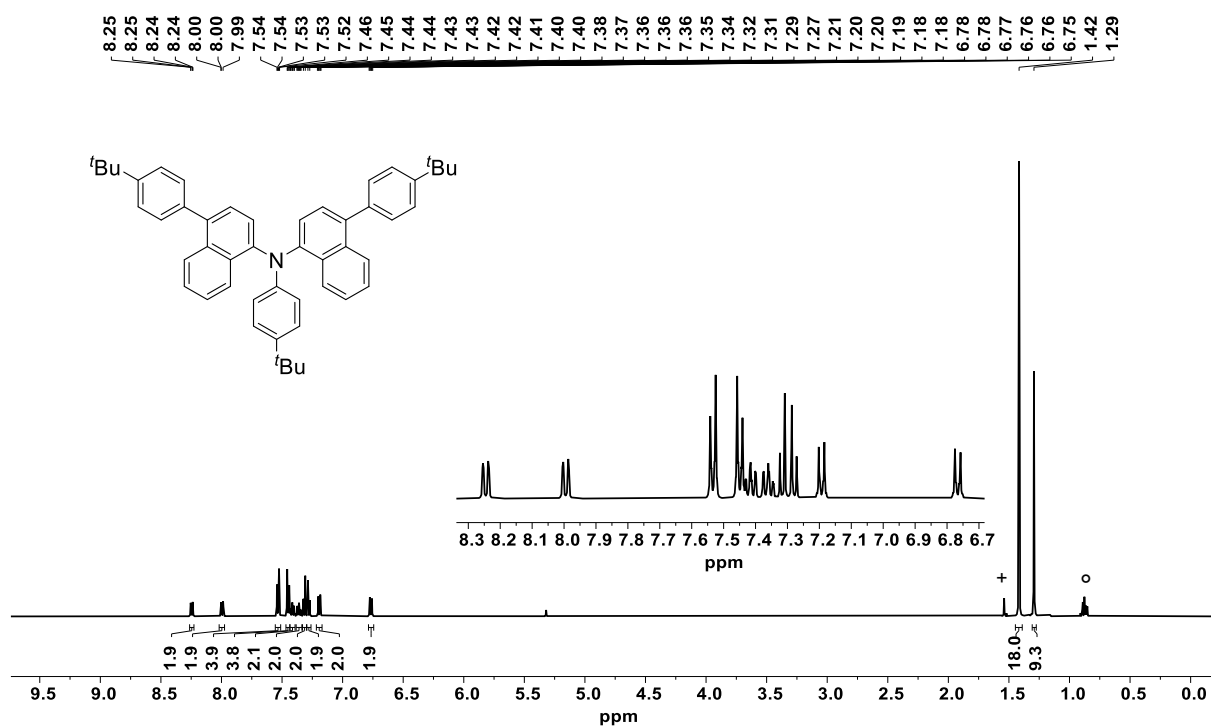

**Figure S16**  $^1\text{H}$  NMR spectrum of **10** (500 MHz,  $\text{CD}_2\text{Cl}_2$ , rt); ° petroleum ether, + water.

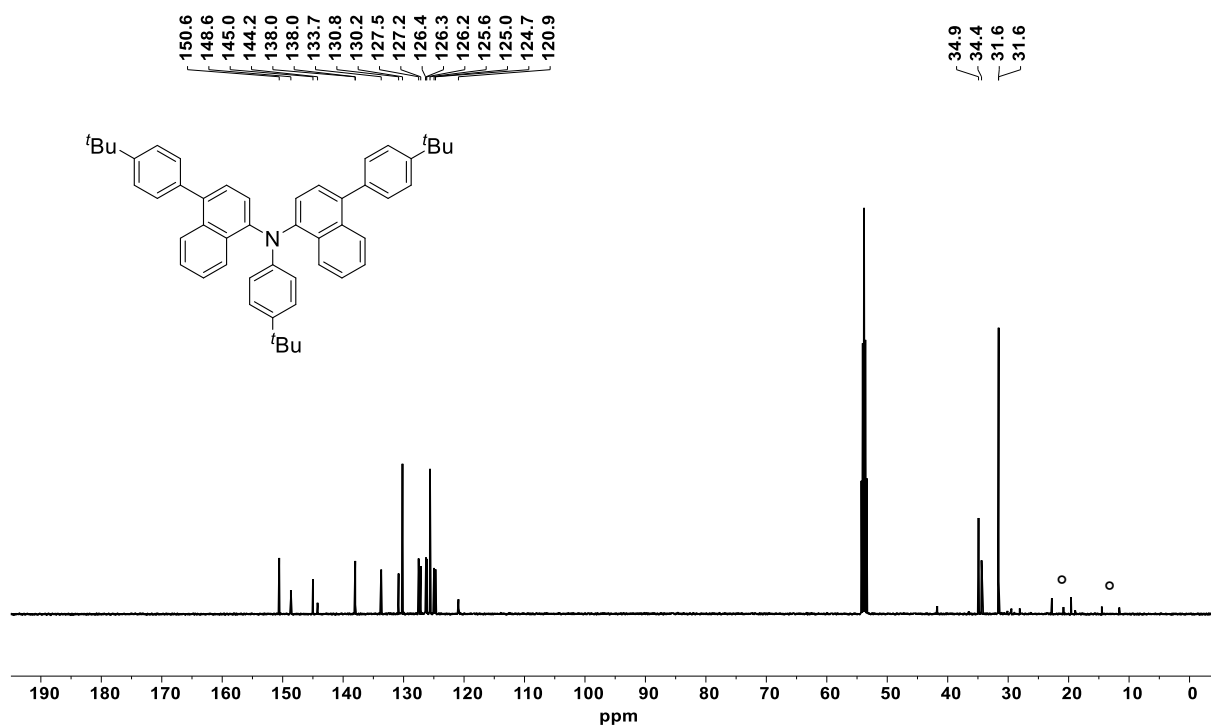

**Figure S17** <sup>13</sup>C NMR spectrum of **10** (126 MHz, CD<sub>2</sub>Cl<sub>2</sub>, rt); ° petroleum ether.

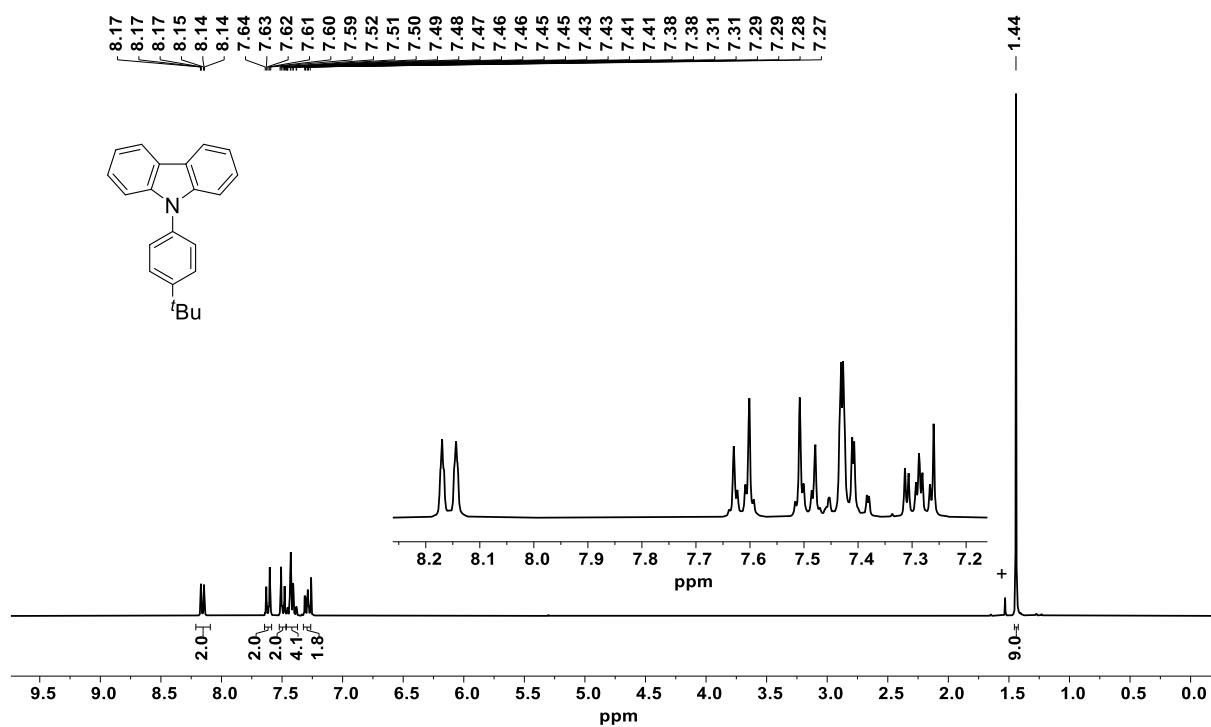

**Figure S18** <sup>1</sup>H NMR spectrum of **11** (301 MHz, CDCl<sub>3</sub>, rt); + water.

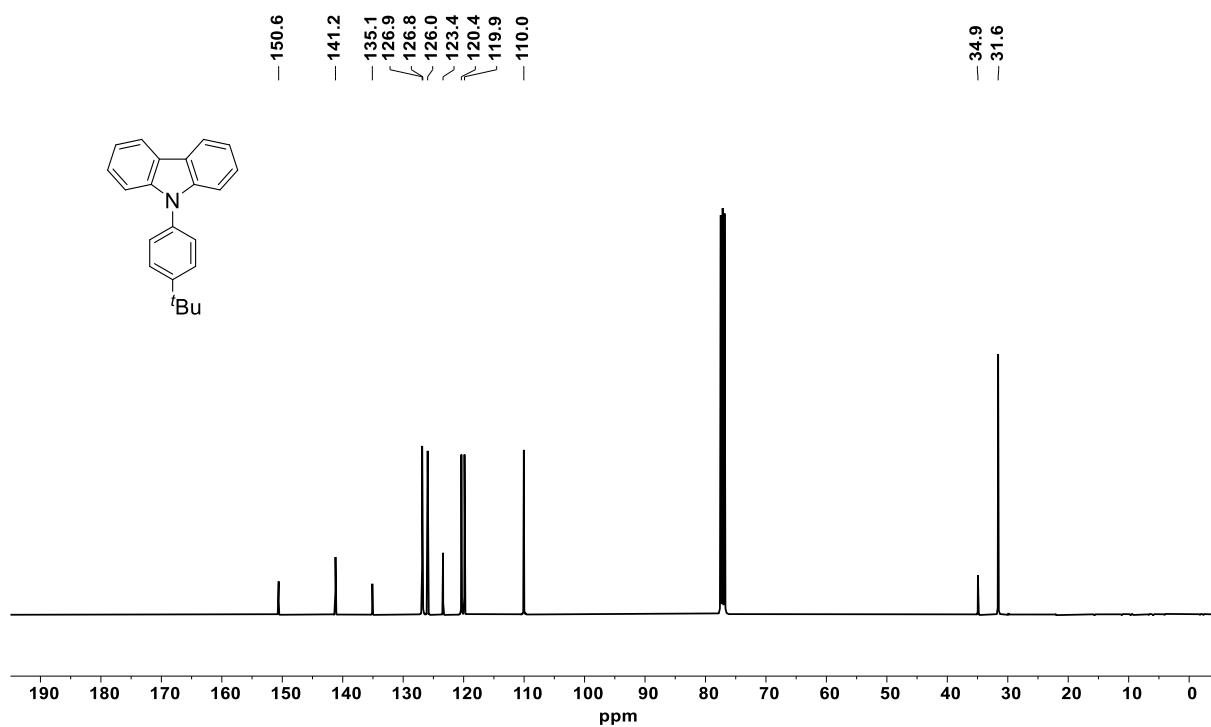

**Figure S19** <sup>13</sup>C NMR spectrum of **11** (101 MHz, CDCl<sub>3</sub>, rt).



## 4 Crystallographic Data Collection and Structure Determination

### Crystal data for compound 5

Single crystals of compound **5** were obtained at rt from CH<sub>2</sub>Cl<sub>2</sub>/MeOH by slow evaporation. CCDC 2170907 contains the supplementary crystallographic data for this paper. The data can be obtained free of charge from The Cambridge Crystallographic Data Centre via [www.ccdc.cam.ac.uk/structures](http://www.ccdc.cam.ac.uk/structures).

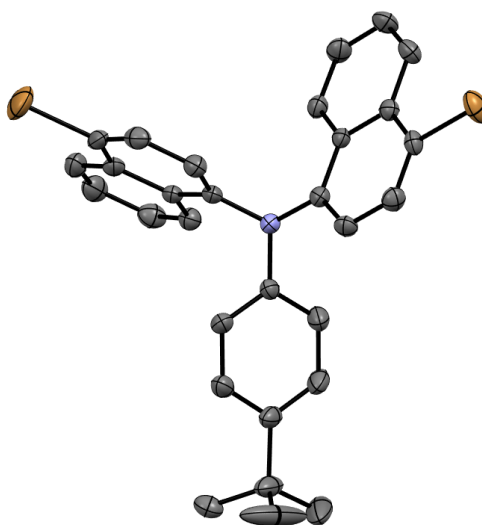

**Figure S20** X-ray crystal structure of compound **5** (50% probability level, H-atoms omitted).

**Table S1** Crystallographic data of **5**.

|                                 |                                                                                                                                                 |
|---------------------------------|-------------------------------------------------------------------------------------------------------------------------------------------------|
| Empirical formula               | C <sub>30</sub> H <sub>25</sub> Br <sub>2</sub> N                                                                                               |
| Formula weight                  | 559.33                                                                                                                                          |
| Temperature                     | 200(2) K                                                                                                                                        |
| Wavelength                      | 0.71073 Å                                                                                                                                       |
| Crystal system                  | monoclinic                                                                                                                                      |
| Space group                     | <i>P</i> 2 <sub>1</sub> / <i>n</i>                                                                                                              |
| Z                               | 4                                                                                                                                               |
| Unit cell dimensions            | <i>a</i> = 9.9459(5) Å $\alpha$ = 90 deg.<br><i>b</i> = 21.7625(10) Å $\beta$ = 107.8511(10) deg.<br><i>c</i> = 12.1602(6) Å $\gamma$ = 90 deg. |
| Volume                          | 2505.3(2) Å <sup>3</sup>                                                                                                                        |
| Density (calculated)            | 1.48 g/cm <sup>3</sup>                                                                                                                          |
| Absorption coefficient          | 3.25 mm <sup>-1</sup>                                                                                                                           |
| Crystal shape                   | column                                                                                                                                          |
| Crystal size                    | 0.354 x 0.103 x 0.098 mm <sup>3</sup>                                                                                                           |
| Crystal color                   | yellow                                                                                                                                          |
| Theta range for data collection | 1.9 to 29.2 deg.                                                                                                                                |
| Index ranges                    | -12 ≤ <i>h</i> ≤ 13, -29 ≤ <i>k</i> ≤ 29, -16 ≤ <i>l</i> ≤ 16                                                                                   |
| Reflections collected           | 28853                                                                                                                                           |

|                                      |                                           |
|--------------------------------------|-------------------------------------------|
| Independent reflections              | 6308 (R(int) = 0.0541)                    |
| Observed reflections                 | 4140 ( $I > 2\sigma(I)$ )                 |
| Absorption correction                | semi-empirical from equivalents           |
| Max. and min. transmission           | 0.77 and 0.58                             |
| Refinement method                    | full-matrix least-squares on $F^2$        |
| Data/restraints/parameters           | 6308 / 0 / 301                            |
| Goodness-of-fit on $F^2$             | 1.02                                      |
| Final R indices ( $I > 2\sigma(I)$ ) | R1 = 0.043, wR2 = 0.076                   |
| Largest diff. peak and hole          | 0.55 and $-0.65 \text{ e}\text{\AA}^{-3}$ |

---

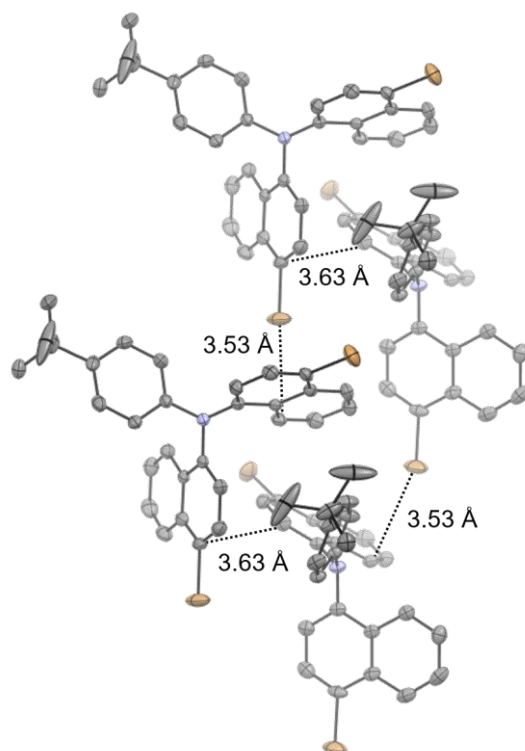

**Figure S21** Solid state packing of compound **5** (50% probability level, H-atoms omitted).

### Crystal data for compound 9

Single crystals of compound **9** were obtained at rt from CH<sub>2</sub>Cl<sub>2</sub>/MeOH by slow evaporation. CCDC 2170908 contains the supplementary crystallographic data for this paper. The data can be obtained free of charge from The Cambridge Crystallographic Data Centre via [www.ccdc.cam.ac.uk/structures](http://www.ccdc.cam.ac.uk/structures).

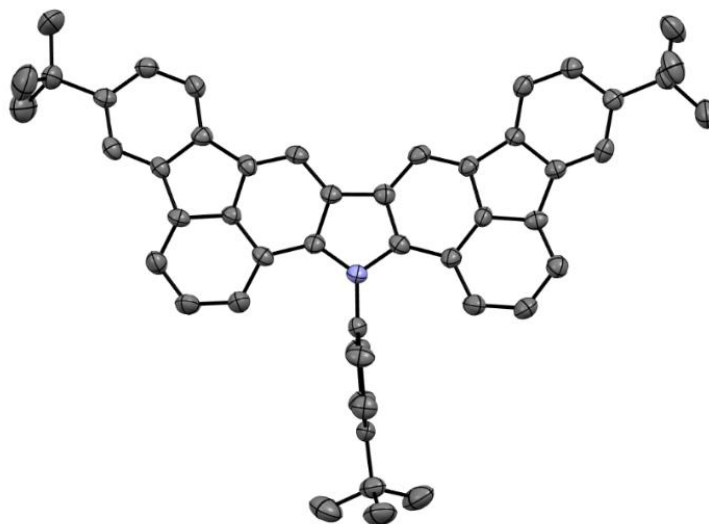

**Figure S22** X-ray crystal structure of compound **9** (50% probability level, H-atoms omitted).

**Table S2** Crystallographic data of **9**.

|                                 |                                                                                                                                                             |
|---------------------------------|-------------------------------------------------------------------------------------------------------------------------------------------------------------|
| Empirical formula               | C <sub>50</sub> H <sub>45</sub> N                                                                                                                           |
| Formula weight                  | 659.87                                                                                                                                                      |
| Temperature                     | 200(2) K                                                                                                                                                    |
| Wavelength                      | 0.71073 Å                                                                                                                                                   |
| Crystal system                  | triclinic                                                                                                                                                   |
| Space group                     | <i>P</i> $\bar{1}$                                                                                                                                          |
| Z                               | 2                                                                                                                                                           |
| Unit cell dimensions            | <i>a</i> = 10.6513(9) Å $\alpha$ = 78.689(2) deg.<br><i>b</i> = 10.9541(9) Å $\beta$ = 79.654(2) deg.<br><i>c</i> = 16.8546(14) Å $\gamma$ = 77.539(2) deg. |
| Volume                          | 1863.4(3) Å <sup>3</sup>                                                                                                                                    |
| Density (calculated)            | 1.18 g/cm <sup>3</sup>                                                                                                                                      |
| Absorption coefficient          | 0.07 mm <sup>-1</sup>                                                                                                                                       |
| Crystal shape                   | plate                                                                                                                                                       |
| Crystal size                    | 0.225 x 0.120 x 0.050 mm <sup>3</sup>                                                                                                                       |
| Crystal color                   | yellow                                                                                                                                                      |
| Theta range for data collection | 1.9 to 19.2 deg.                                                                                                                                            |
| Index ranges                    | -9 ≤ <i>h</i> ≤ 9, -10 ≤ <i>k</i> ≤ 10, -15 ≤ <i>l</i> ≤ 15                                                                                                 |
| Reflections collected           | 13335                                                                                                                                                       |
| Independent reflections         | 3070 ( <i>R</i> (int) = 0.0447)                                                                                                                             |
| Observed reflections            | 2320 ( <i>I</i> > 2σ( <i>I</i> ))                                                                                                                           |
| Absorption correction           | semi-empirical from equivalents                                                                                                                             |
| Max. and min. transmission      | 0.74 and 0.68                                                                                                                                               |
| Refinement method               | full-matrix least-squares on <i>F</i> <sup>2</sup>                                                                                                          |
| Data/restraints/parameters      | 3070 / 0 / 469                                                                                                                                              |

|                                      |                                   |
|--------------------------------------|-----------------------------------|
| Goodness-of-fit on $F^2$             | 1.02                              |
| Final R indices ( $I > 2\sigma(I)$ ) | R1 = 0.047, wR2 = 0.112           |
| Largest diff. peak and hole          | 0.33 and -0.21 $e\text{\AA}^{-3}$ |

---

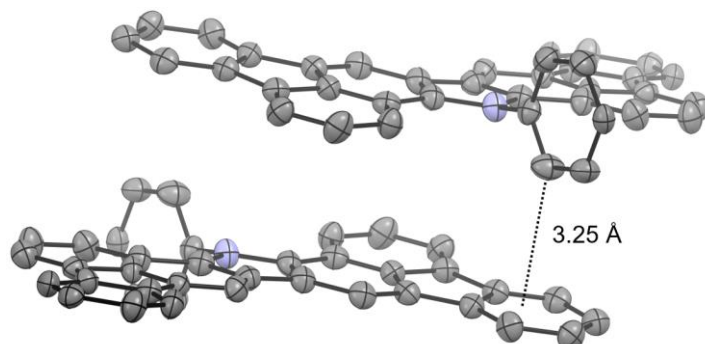

**Figure S23** Edge to face  $C(sp^2)\text{-H}\cdots\pi$ -interactions in the crystal packing of molecule **9** (50% probability level, H-atoms omitted).

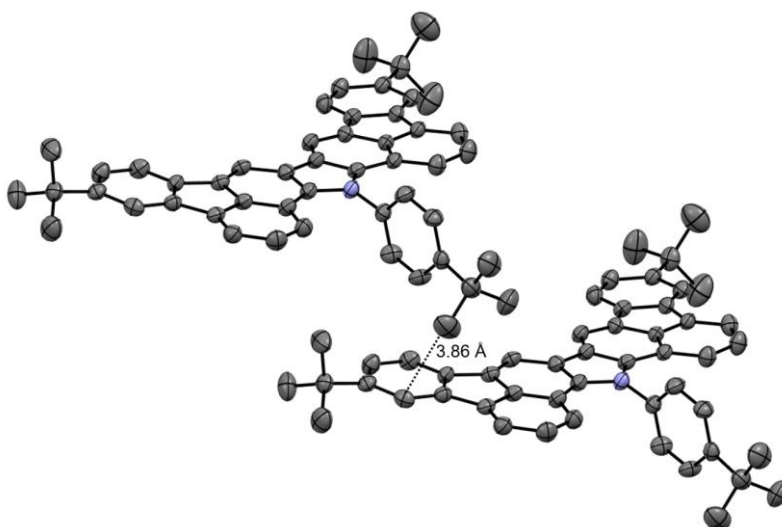

**Figure S24**  $C(sp^3)\text{-H}\cdots\pi$ -interactions in the crystal packing of molecule **9** (50% probability level, H-atoms omitted).

## 5 UV/Vis Spectroscopy

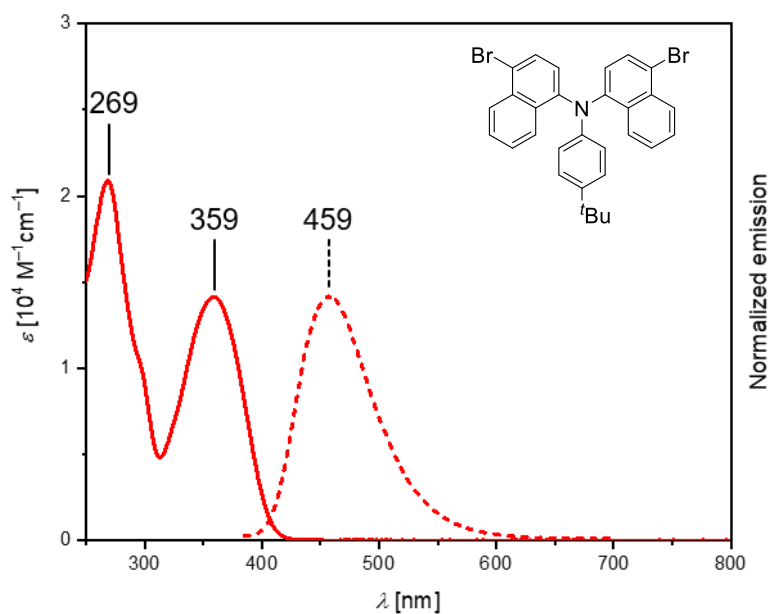

**Figure S25** UV/Vis absorption (solid line) and emission (dashed line) spectrum of **5** recorded in  $\text{CH}_2\text{Cl}_2$  at room temperature.

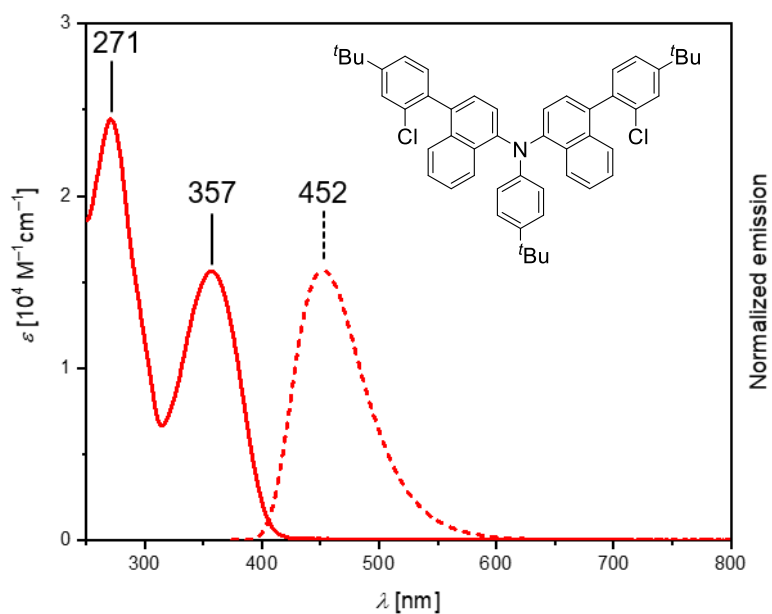

**Figure S26** UV/Vis absorption (solid line) and emission (dashed line) spectrum of **7** recorded in  $\text{CH}_2\text{Cl}_2$  at room temperature.

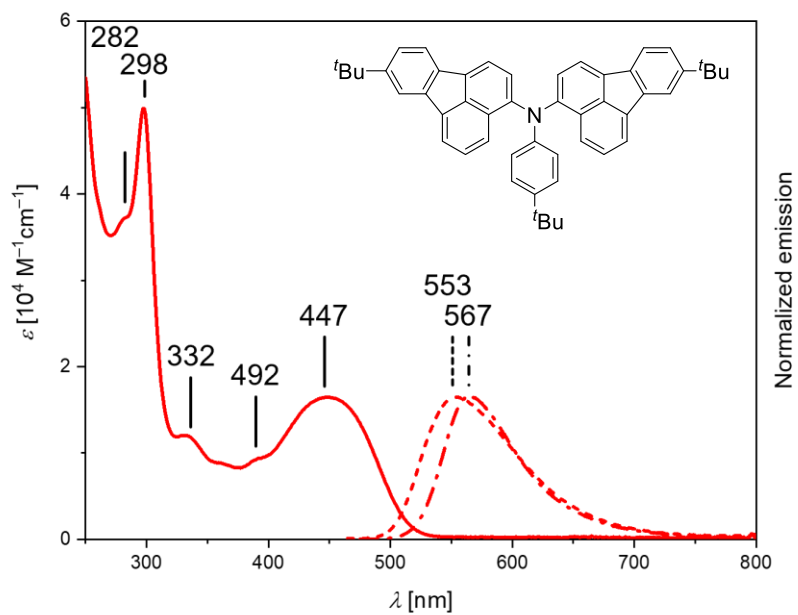

**Figure S27** UV/Vis absorption (solid line) and emission (dashed line) spectrum of **8** recorded in CH<sub>2</sub>Cl<sub>2</sub> at room temperature. UV/Vis solid state emission of **8** (dashed and dotted line) recorded at room temperature.

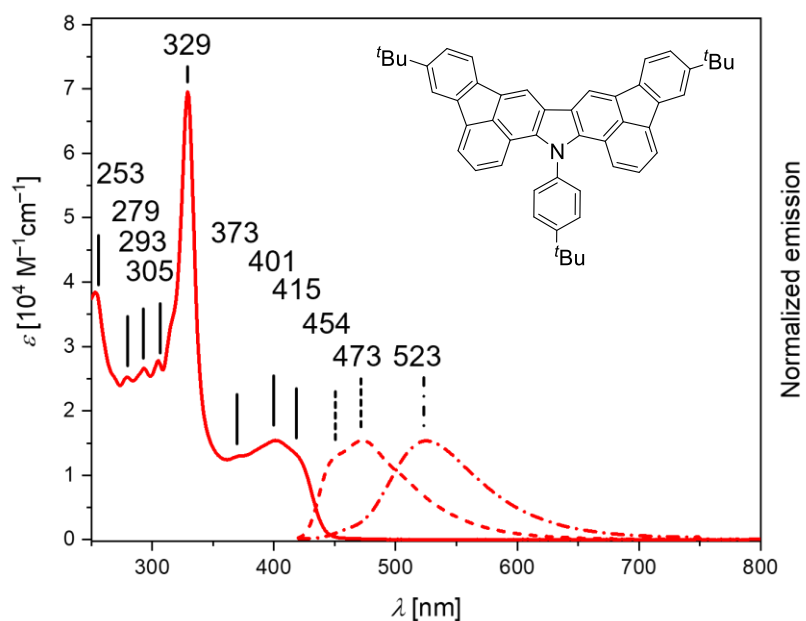

**Figure S28** UV/Vis absorption (solid line) and emission (dashed line) spectrum of **9** recorded in CH<sub>2</sub>Cl<sub>2</sub> at room temperature. UV/Vis solid state emission of **9** (dashed and dotted line) recorded at room temperature.

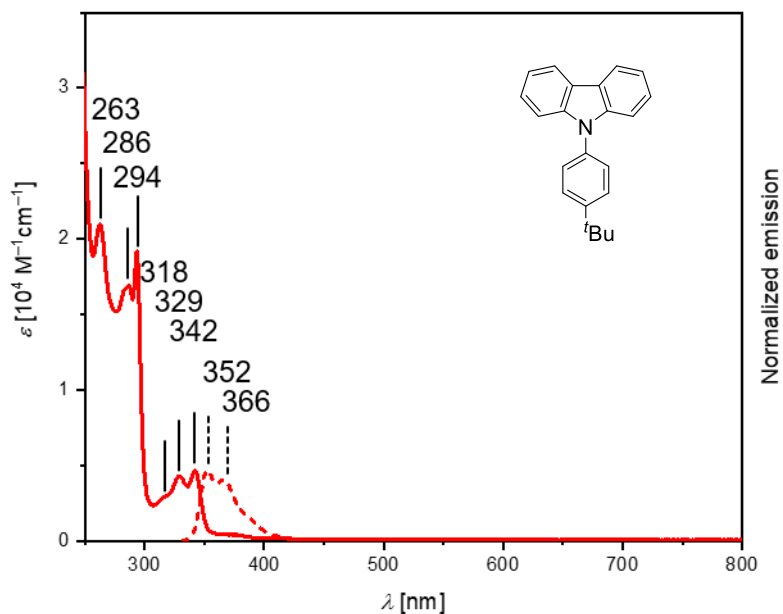

**Figure S29** UV/Vis absorption (solid line) and emission (dashed line) spectrum of **11** recorded in  $\text{CH}_2\text{Cl}_2$  at room temperature.

## 6 Cyclic Voltammetry

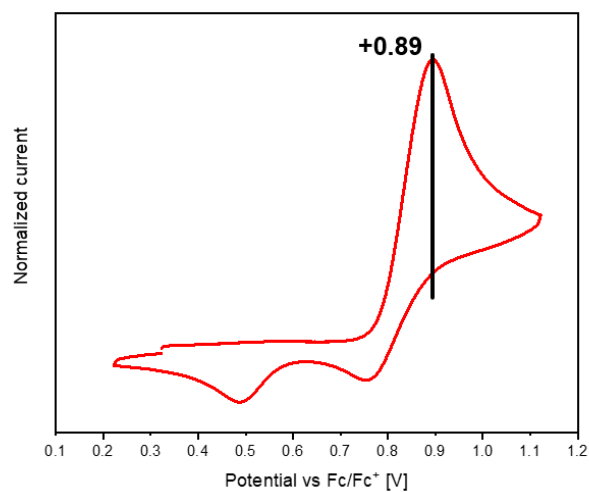

**Figure S30** Cyclic voltammetry of compound **11** measured in  $\text{CH}_2\text{Cl}_2$  at room temperature with  $n\text{-Bu}_4\text{NPF}_6$  as the supporting electrolyte. The scan rate ( $\nu$ ) was set to  $100 \text{ mVs}^{-1}$  and the potentials are referenced against  $\text{Fc}/\text{Fc}^+$ .

## 7 Theoretical Calculations

**Table S3** NICS(0), NICS(+1), and NICS(-1) values of rings A–F in compounds **8**, **9**, and **11**. NICS(+1) values visualized as red dots inside the rings of **8**, **9**, and **11**. The size of the dots represents the relative aromaticity of the rings. Top left: Assignment of the rings A–F.

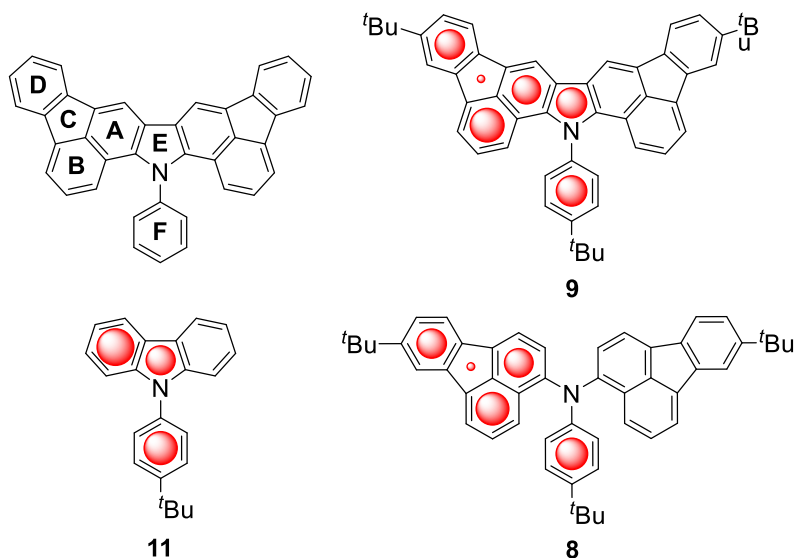

| Ring     | Compound <b>8</b> |          |          | Compound <b>9</b> |          |          | Compound <b>11</b> |          |          |
|----------|-------------------|----------|----------|-------------------|----------|----------|--------------------|----------|----------|
|          | NICS(0)           | NICS(+1) | NICS(-1) | NICS(0)           | NICS(+1) | NICS(-1) | NICS(0)            | NICS(+1) | NICS(-1) |
| <b>A</b> | -7.1              | -8.1     | -8.5     | -7.3              | -8.4     | -8.4     | -10.8              | -11.3    | -11.6    |
| <b>B</b> | -8.5              | -10.2    | -10.0    | -9.2              | -10.6    | -10.6    |                    |          |          |
| <b>C</b> | +4.0              | -0.4     | -0.6     | +3.8              | -0.5     | -0.5     |                    |          |          |
| <b>D</b> | -7.0              | -8.9     | -8.9     | -7.0              | -8.9     | -8.9     |                    |          |          |
| <b>E</b> |                   |          |          | -10.4             | -9.1     | -9.1     | -9.5               | -8.7     | -8.7     |
| <b>F</b> | -8.6              | -9.7     | -9.7     | -8.5              | -9.2     | -9.2     | -9.0               | -10.3    | -10.3    |

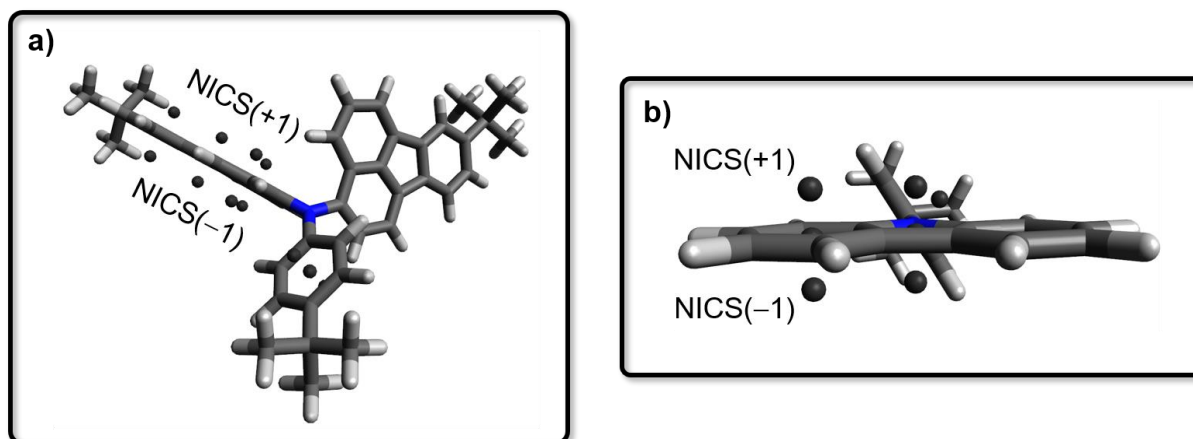

**Figure S31** Placement of dummy atoms for the calculation of NICS(+1) and NICS(-1) values. a) Compound **8**. b) Compound **11**.



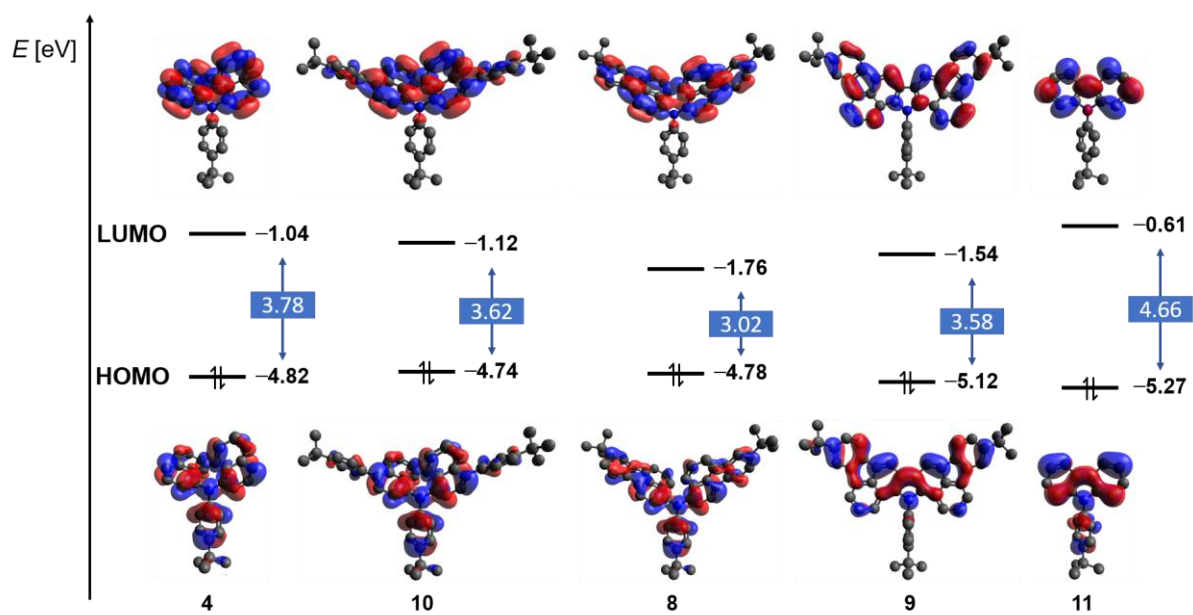

**Figure S32** Frontier molecular orbitals of compounds **4** and **8–11**.

## 8 References

- [1] G. M. Sheldrick, *Acta Cryst A* **2015**, *71*, 3–8.
- [2] G. M. Sheldrick, *Acta Cryst C* **2015**, *71*, 3–8.
- [3] M. J. Frisch, G. W. Trucks, H. B. Schlegel, G. E. Scuseria, M. A. Robb, J. R. Cheeseman, G. Scalmani, V. Barone, G. A. Petersson, H. Nakatsuji, X. Li, M. Caricato, A. V. Marenich, J. Bloino, B. G. Janesko, R. Gomperts, B. Mennucci, H. P. Hratchian, J. V. Ortiz, A. F. Izmaylov, J. L. Sonnenberg, D. Williams-Young, F. Ding, F. Lipparini, F. Egidi, J. Goings, B. Peng, A. Petrone, T. Henderson, D. Ranasinghe, V. G. Zakrzewski, J. Gao, N. Rega, G. Zheng, W. Liang, M. Hada, M. Ehara, K. Toyota, R. Fukuda, J. Hasegawa, M. Ishida, T. Nakajima, Y. Honda, O. Kitao, H. Nakai, T. Vreven, K. Throssell, J. A. Montgomery, Jr, J. E. Peralta, F. Ogliaro, M. J. Bearpark, J. J. Heyd, E. N. Brothers, K. N. Kudin, V. N. Staroverov, T. A. Keith, R. Kobayashi, J. Normand, K. Raghavachari, A. P. Rendell, J. C. Burant, S. S. Iyengar, J. Tomasi, M. Cossi, J. M. Millam, M. Klene, C. Adamo, R. Cammi, J. W. Ochterski, R. L. Martin, K. Morokuma, O. Farkas, J. B. Foresman, D. J. Fox, *Gaussian 16*; Gaussian, Inc, Wallingford CT, **2016**.
- [4] a) A. D. Becke, *Phys. Rev. A* **1988**, *38*, 3098–3100; b) C. Lee, W. Yang, R. G. Parr, *Phys. Rev. B Condens. Matter* **1988**, *37*, 785–789; c) A. D. Becke, *Appl. Phys. Lett.* **1993**, *98*, 5648–5652.
- [5] a) W. J. Hehre, R. Ditchfield, J. A. Pople, *Appl. Phys. Lett.* **1972**, *56*, 2257–2261; b) P. C. Hariharan, J. A. Pople, *Theoret. Chim. Acta* **1973**, *28*, 213–222.
- [6] a) P. v. R. Schleyer, C. Maerker, A. Dransfeld, H. Jiao, N. J. R. van Eikema Hommes, *J. Am. Chem. Soc.* **1996**, *118*, 6317–6318; b) P. v. R. Schleyer, H. Jiao, N. J. R. E. van Hommes, V. G. Malkin, O. L. Malkina, *J. Am. Chem. Soc.* **1997**, *119*, 12669–12670; c) Z. Chen, C. S. Wannere, C. Corminboeuf, R. Puchta, P. v. R. Schleyer, *Chem. Rev.* **2005**, *105*, 3842–3888.
- [7] a) F. London, *J. Phys. Radium* **1937**, *8*, 397–409; b) R. McWeeny, *Phys. Rev.* **1962**, *126*, 1028–1034; c) R. Ditchfield, *Mol. Phys* **1974**, *27*, 789–807; d) K. Wolinski, J. F. Hinton, P. Pulay, *J. Am. Chem. Soc.* **1990**, *112*, 8251–8260; e) J. R. Cheeseman, G. W. Trucks, T. A. Keith, M. J. Frisch, *J. Chem. Phys.* **1996**, *104*, 5497–5509.
- [8] a) *Avogadro: an open-source molecular builder and visualization tool. Version 1.2.0.* <http://avogadro.cc/>; b) M. D. Hanwell, D. E. Curtis, D. C. Lonie, T. Vandermeersch, E. Zurek, G. R. Hutchison, *J. Cheminform* **2012**, *4*, 17.
- [9] D. A. Leas, Y. Dong, J. L. Vennerstrom, D. E. Stack, *Org. Lett.* **2017**, *19*, 2518–2521.
- [10] E. Demory, V. Blandin, J. Einhorn, P. Y. Chavant, *Org. Process Res. Dev.* **2011**, *15*, 710–716.
- [11] a) J. F. Ambrose, L. L. Carpenter, R. F. Nelson, *J. Electrochem. Soc.* **1975**, *122*, 876–894; b) L. Wei, J. Li, K. Xue, S. Ye, H. Jiang, *New J. Chem.* **2019**, *43*, 16629–16638.
